# Supplementary material
Source: Springer Nature journal article supplement (https://www.springermedizin.de/resource/supplementary/12889_2013_6768_MOESM2_ESM.pdf/9498858)
Supplement: MOESM2 [file 9498858]

## Additional file 2

### **Definitions of the final themes mapped to construct the conceptual model**

---

#### ***A priori* themes after deductive reasoning**

---

##### ***A priori* themes retained as such**

1. *Awareness*: The knowledge about health risks and the benefits of different health practices, including knowledge about the causes, consequences and solutions for a particular problem behaviour.
  2. *Self-evaluation*: Self-assessment of a particular behaviour in terms of possibilities and potential avenues for bringing about a change in the said behaviour.
  3. *Helpful relationships*: Includes relationships that promote caring, trust, openness, acceptance and support for the healthy behaviour change.
  4. *Perceived seriousness*: Judgment as to the seriousness or severity of the disease, health problem or behaviour.
  5. *Personal modifiers*: Characteristics that influence personal perceptions, such as culture, education level and past experiences.
  6. *Attitude*: Refers to the degree to which a person has a favourable or unfavourable evaluation or appraisal of the behaviour in question.
- 

##### ***A priori* themes retained with modifications**

1. *Identifying stages-of-change (pre-contemplation, intention and action)*: This is the key construct of the model, which focused on identifying cues to differentiate households to three stages-of-change (instead of the original five: pre-contemplation, contemplation, preparation, action, maintenance).
    - Pre-contemplation (pre-contemplation): people do not intend to take action in the foreseeable future.
    - Intention (contemplation + preparation): people intend to take action in the immediate future, hence are more aware of the pros and cons; and have already taken some significant steps in a positive direction.
    - Action (action + maintenance): people have made specific overt modifications in their life-styles or are engaged to prevent relapse.
  2. *Household efficacy*: belief or confidence in their ability as a household to control their behaviour and bring about a change or cope with different situations without relapsing to the earlier unhealthy habit.
  3. *Decisional balance*: relative weighing of the pros and cons of changing behaviour; and their opinion of the value or usefulness of a new behaviour in decreasing the risk of developing a disease or health problem in terms of the expected costs and benefits.
  4. *Substitution opportunities*: learning of healthier behaviour that can substitute for problem or unhealthy behaviour.
  5. *Perceived risk*: self-assessment of the chances of acquiring a disease or health problem due to the continuation of an unhealthy behaviour.
  6. *Perceived societal response*: perceived social pressure to perform or not to perform a particular behaviour.
  7. *Cues to action*: events, people or things that prompt a desire to change behaviour.
-

---

**New themes identified after inductive reasoning**

---

1. *Accessibility*: combination of availability that includes physical access and affordability that includes all the costs associated with accessing foods.
  2. *Perceived needs and preferences*: special needs and preferences of other household members as perceived by the female head of the household.
  3. *Societal norms*: gender, socio-economic status and other higher hierarchical power structures in the household and community that influence behaviour.
  4. *Perceived household response*: includes perceived willingness (or consent) to participate in a behaviour-change intervention; and the level of cooperation expected from other household members for such an endeavour as perceived by the female head of the household.
-
